# Supplementary material for: Construction of a BiVO4/VS-MoS2 S-scheme heterojunction for efficient photocatalytic nitrogen fixation
Source: Royal Society of Chemistry journal article supplement (doi:10.1039/d3na01091k), 2024-01-01
Supplement: d3na01091k1.pdf [file d3na01091k1.pdf]

## ***Electronic supplementary information***

### **Construction of BiVO<sub>4</sub>/V<sub>S</sub>-MoS<sub>2</sub> S-scheme heterojunction for efficient photocatalytic nitrogen fixation**

Han-Ying Luo,<sup>‡a</sup> Zhao-Lei Liu,<sup>‡a</sup> Meng-Ran Zhang,<sup>a</sup> Yan-Fei Mu,<sup>\*b</sup> Min Zhang<sup>\*a</sup>

<sup>a</sup>MOE International Joint Laboratory of Materials Microstructure, Institute for New Energy Materials and Low Carbon Technologies, School of Materials Science and Engineering, School of Chemistry and Chemical Engineering, Tianjin University of Technology, Tianjin 300384, China.

<sup>b</sup>School of Chemistry and Chemical Engineering, Yangzhou University, Yangzhou, 225009, Jiangsu, China.

<sup>‡</sup>These authors contributed equally to this work.

<sup>\*</sup>Corresponding author.

E-mail: 007916@yzu.edu.cn; zm2016@email.tjut.edu.cn.

## 1. Experimental section

**Materials:** Bismuth nitrate pentahydrate ( $\text{Bi}(\text{NO}_3)_3 \cdot 5\text{H}_2\text{O}$ , 99%), sodium molybdate dihydrate ( $\text{Na}_2\text{MoO}_4 \cdot 2\text{H}_2\text{O}$ , 99.9%), thiourea ( $\text{CH}_4\text{N}_2\text{S}$ , AR, 99%), dimethyl sulfoxide (DMSO, HPLC,  $\geq 99.9\%$ ), isopropanol (HPLC,  $\geq 99.5\%$ ), sodium metavanadate ( $\text{NaVO}_3$ , 99%), potassium bromide (KI, HPLC), tetrabutylammonium hexafluorophosphate ( $\text{TBAPF}_6$ ), sodium hydroxide ( $\text{NaOH}$ , 99%), anhydrous ethanol (99.9%), and toluene (99.5%) were purchased from china pharmaceutical group co. ltd.  $^{15}\text{N}_2$  ( $\geq 99\%$ ) was purchased from wuhan isotope technology co. ltd.  $\text{H}_2^{18}\text{O}$  ( $\geq 98\%$ ) was purchased from Energy Chemical. Unless otherwise specified, all chemicals are commercially available and used without further purification.

**Instrument:** The SEM images were obtained from FEI Verios 460L. The TEM images were obtained from LaB6 Gun (Tecnai G2 Spirit TWIN, FEI, USA). The HRTEM and STEM–EDS images were obtained from Talos F200X transmission electron microscope (FEI). The PXRD patterns were collected from a Rigaku diffractometer (SmartLab, 9 kW, Rigaku, Japan). The FTIR spectra were obtained from the PerkinElmer Frontier mid–IR FTIR spectrometer. The XPS measurements were performed on an ESCALAB Model 250Xi X–ray photoelectron spectrometer. The UPS spectra were obtained from an ESCALAB250Xi type X–ray photoelectron spectrometer (Thermo scientific). The ion chromatograms were collected from an ECO ion chromatograph (NEXION300, PerkinElmer, America). The EPR spectra were obtained from an EPR spectrometer (EXMplus6–1, Bruker, Germany). The  $^{15}\text{N}$  NMR spectra of the reaction solutions were determined using a Bruker NMR spectrometer (A V ANCE III HD 400 MHz). The UV–Visible spectra were obtained from a Lambda 750 UV/VIS/NIR by PerkinElmer. The Zeta potentials were characterized using a 90Plus Zeta by BIC, USA. The atomic force microscope height mapping images and surface photovoltage response measurements were detected through an *in-situ* photo-assisted Kelvin probe force microscopy (KPFM) technique on a Bruker Dimension Fast Scan AFM system with the model of conductive probe SCM-PIT-V2.

**Photoelectrochemical experiments:** All photoelectrochemical characterizations were performed on a CHI 760E electrochemical workstation with a three-electrode configuration with catalyst attached FTO glass (0.5 cm<sup>2</sup>), Pt sheet, and Ag/AgCl (3 M KCl) as the working, counting, and reference electrodes, respectively. An acetonitrile-filled cell with 0.1 M TBAPF<sub>6</sub> was used as the electrolyte. The light source and optical density were consistent with the photocatalytic N<sub>2</sub> reduction test.

## 2. Supplementary Figs S1–S26 and Table S2

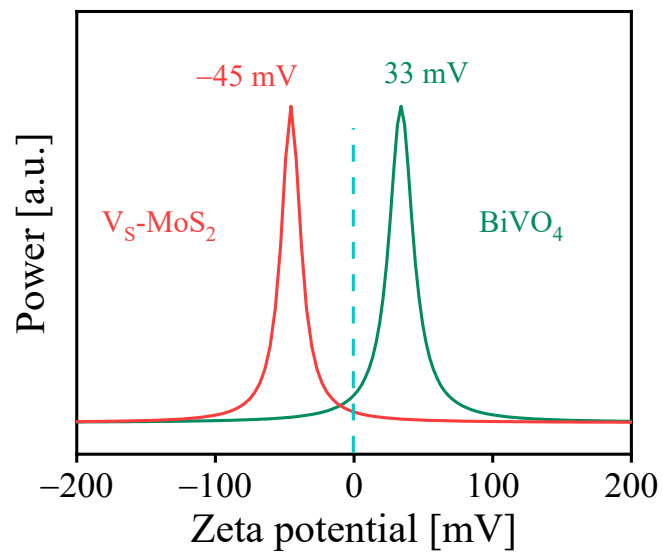

**Fig. S1.** Zeta potentials of as-prepared  $V_S\text{-MoS}_2$  nanosheet and  $\text{BiVO}_4$  nanocrystal.

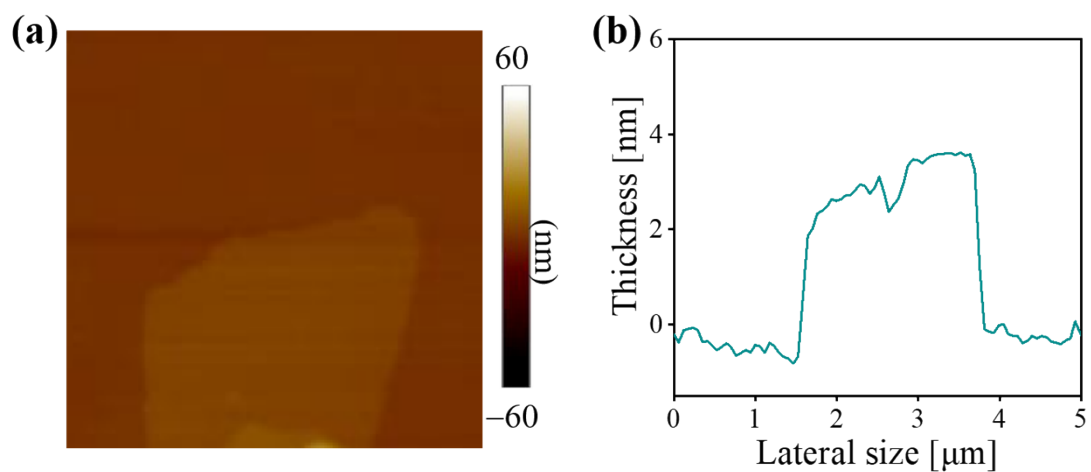

**Fig. S2.** (a) AFM image and (b) the corresponding height cross-sectional profile of V<sub>5</sub>-MoS<sub>2</sub> deposited on the silicon substrate.

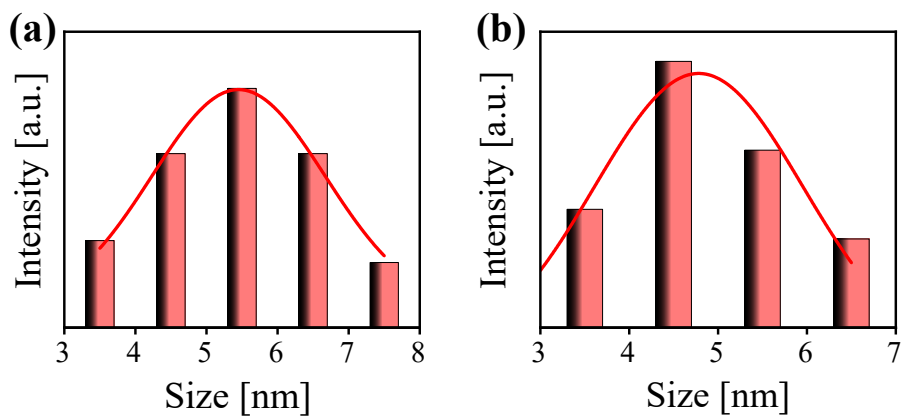

**Fig. S3.** The size distributions of (a) pristine BiVO<sub>4</sub> and (b) BiVO<sub>4</sub> in BiVO<sub>4</sub>/V<sub>s</sub>-MoS<sub>2</sub> heterojunction.

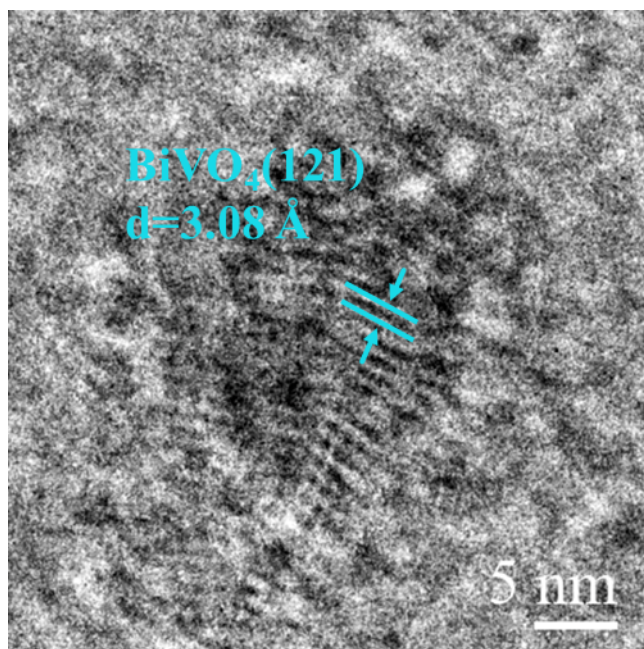

**Fig. S4.** HRTEM image of as-prepared BiVO<sub>4</sub> nanocrystal.

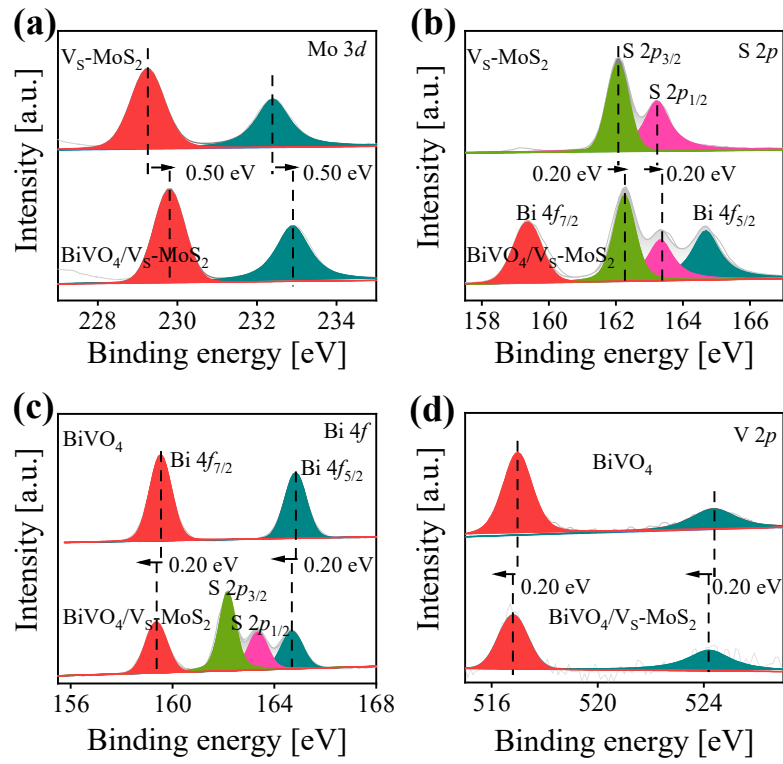

**Fig. S5.** High-resolution XPS spectra of  $V_S\text{-MoS}_2$ ,  $\text{BiVO}_4$  and  $\text{BiVO}_4/V_S\text{-MoS}_2$ , (a) Mo 3d, (b) S 2p, (c) Bi 4f, and (d) V 2p.



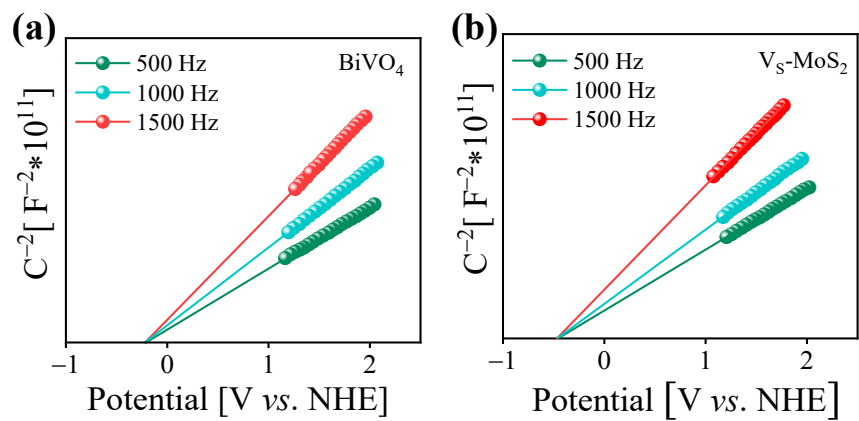

**Fig. S6.** Mott-Schottky plots of (a) BiVO<sub>4</sub> and (b) V<sub>S</sub>-MoS<sub>2</sub>.

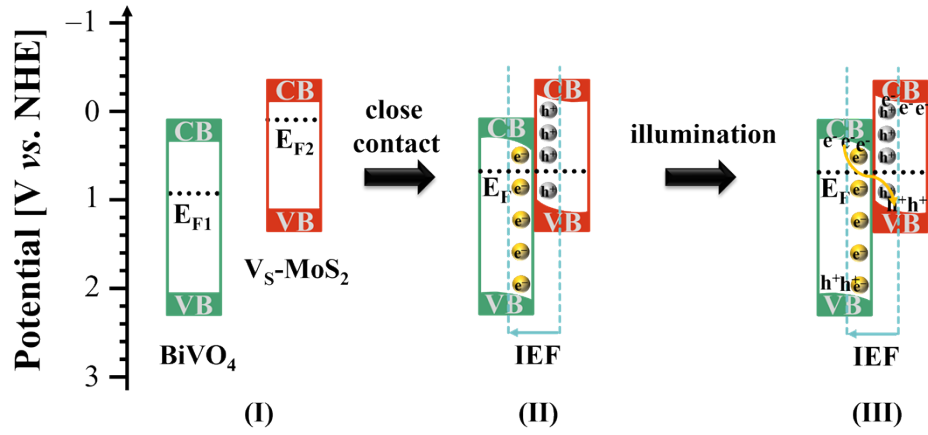

**Fig. S7.** The formation and working mechanism of S-scheme in  $\text{BiVO}_4/\text{V}_\text{S}\text{-MoS}_2$ : (I) energy band structures of  $\text{BiVO}_4$  and  $\text{V}_\text{S}\text{-MoS}_2$  before contact; (II) Fermi level alignment and formation of the built-in electric field; (III) charge transfer process under illumination. ( $E_{\text{F1}}$ : Fermi level of  $\text{BiVO}_4$ ,  $E_{\text{F2}}$ : Fermi level of  $\text{V}_\text{S}\text{-MoS}_2$ ,  $E_{\text{F}}$ : Fermi level of  $\text{BiVO}_4/\text{V}_\text{S}\text{-MoS}_2$ , IEF: built-in electric field.)

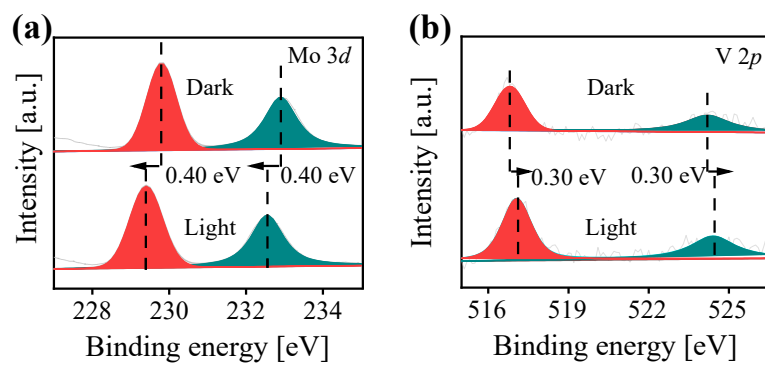

**Fig. S8.** High-resolution XPS spectra of BiVO<sub>4</sub>/V<sub>S</sub>-MoS<sub>2</sub> in the dark or under 300 W Xe lamp irradiation. (a) Mo 3*d* and (b) V 2*p*.

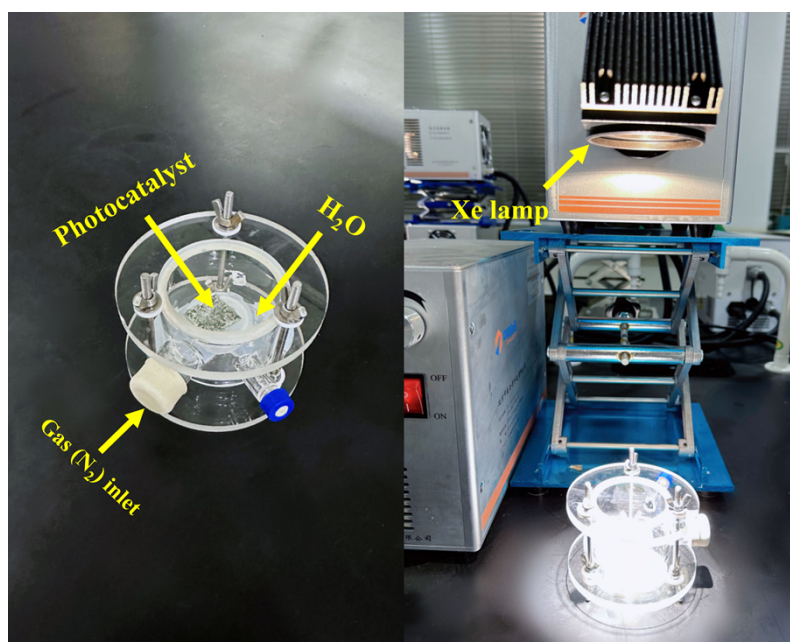

**Fig. S9.** The gas–solid reaction apparatus for photocatalytic N<sub>2</sub> reduction.

**Table S1.** Fitting parameters of EIS spectra in Fig. 3b.

| Sample                                              | $R_1$ [ $\Omega$ ] | $R_2$ [ $\Omega$ ] |
|-----------------------------------------------------|--------------------|--------------------|
| BiVO <sub>4</sub>                                   | 76                 | 7000               |
| V <sub>S</sub> -MoS <sub>2</sub>                    | 47                 | 4000               |
| BiVO <sub>4</sub> /V <sub>S</sub> -MoS <sub>2</sub> | 30                 | 1214               |

$R_1$ : series resistance.

$R_2$ : charge transport resistance.

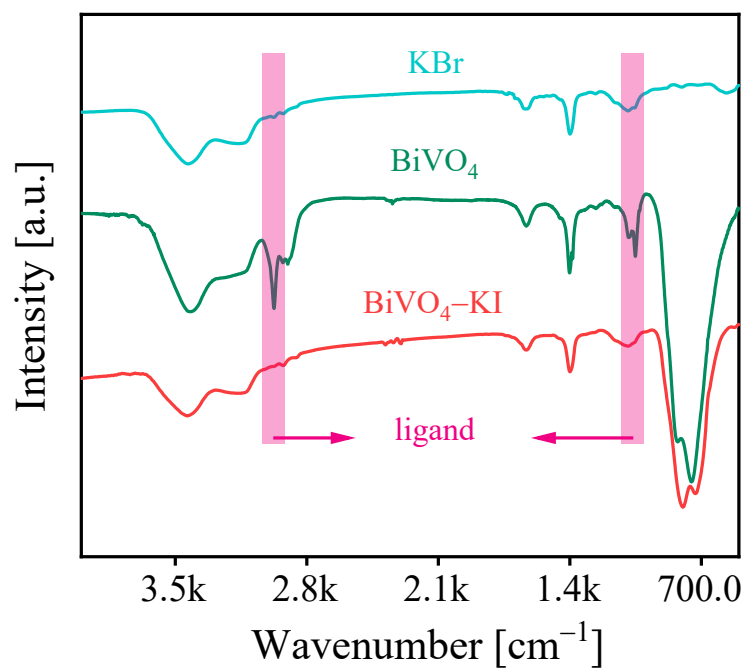

**Fig. S10.** FT-IR spectra of  $\text{BiVO}_4$  and  $\text{BiVO}_4\text{-KI}$ .

The  $\text{BiVO}_4$  nanocrystal was first synthesized by the thermal injection method. Peaks at  $1052\text{ cm}^{-1}$  and  $2978\text{ cm}^{-1}$  can be assigned to the characteristic vibration of the ligands. It can be seen that the ligands have been completely removed after treatment with DMSO solution of KI.

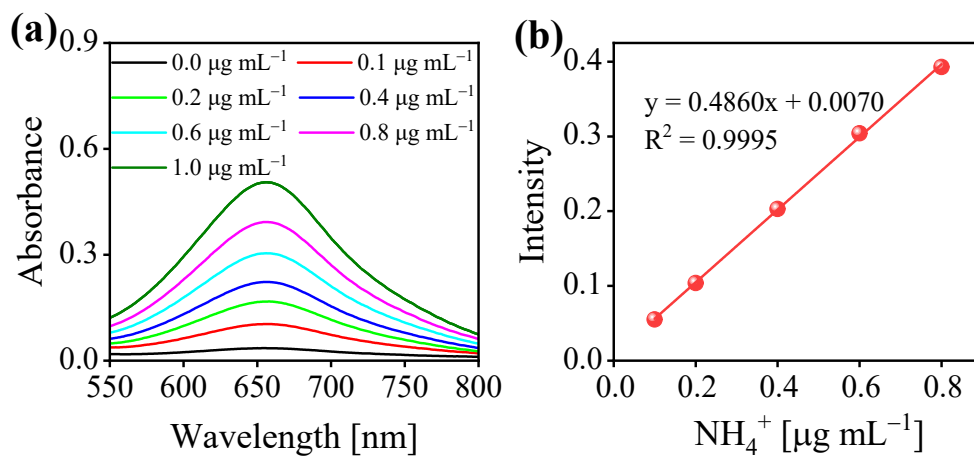

**Fig. S11.** (a) UV–Vis absorption spectra of  $\text{NH}_4^+$  solutions with different concentrations measured by the indophenol blue method. (b) The standard curve of  $\text{NH}_4^+$ .

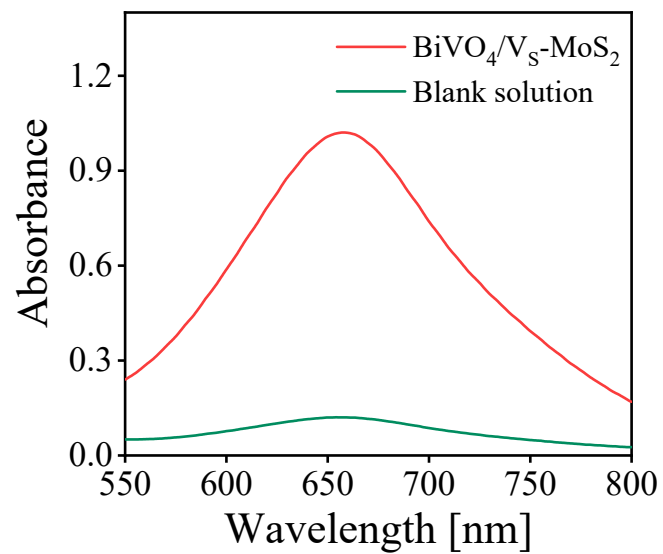

**Fig. S12.** The UV–Vis absorption spectra of blank solution and products solution with BiVO<sub>4</sub>/V<sub>S</sub>-MoS<sub>2</sub> as photocatalyst measured by indophenol blue method.



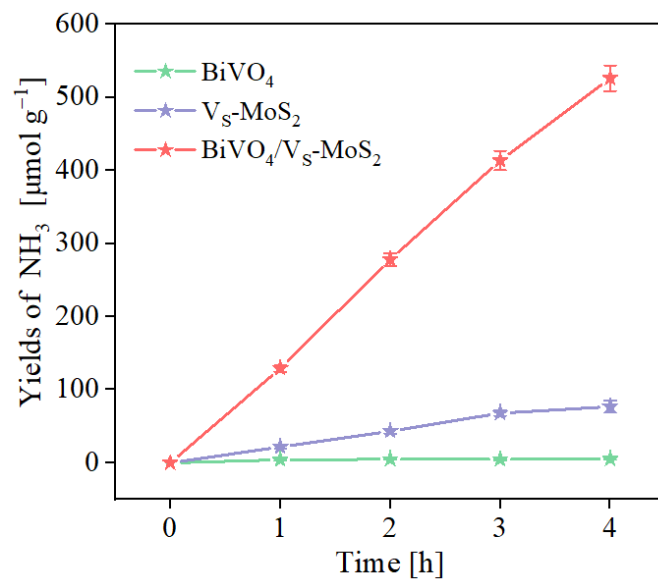

**Fig. S13.** The time-dependent photocatalytic NH<sub>3</sub> production of BiVO<sub>4</sub>, V<sub>S</sub>-MoS<sub>2</sub>, and BiVO<sub>4</sub>/V<sub>S</sub>-MoS<sub>2</sub> composites.

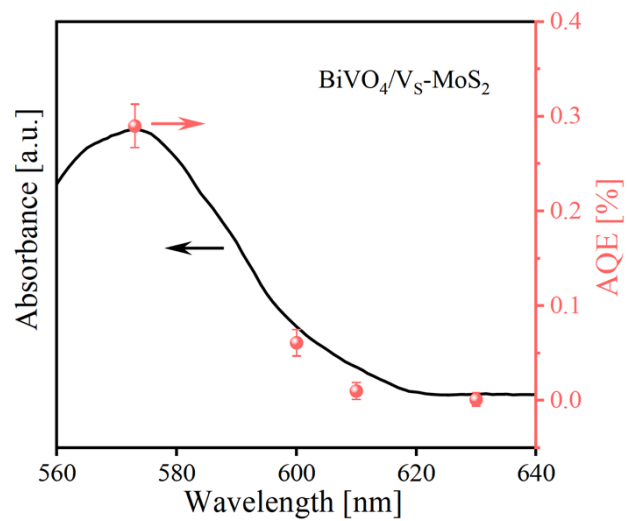

**Fig. S14.** The apparent quantum efficiency (AQE) of  $\text{BiVO}_4/\text{V}_5\text{-MoS}_2$  for photocatalytic  $\text{NH}_3$  production.

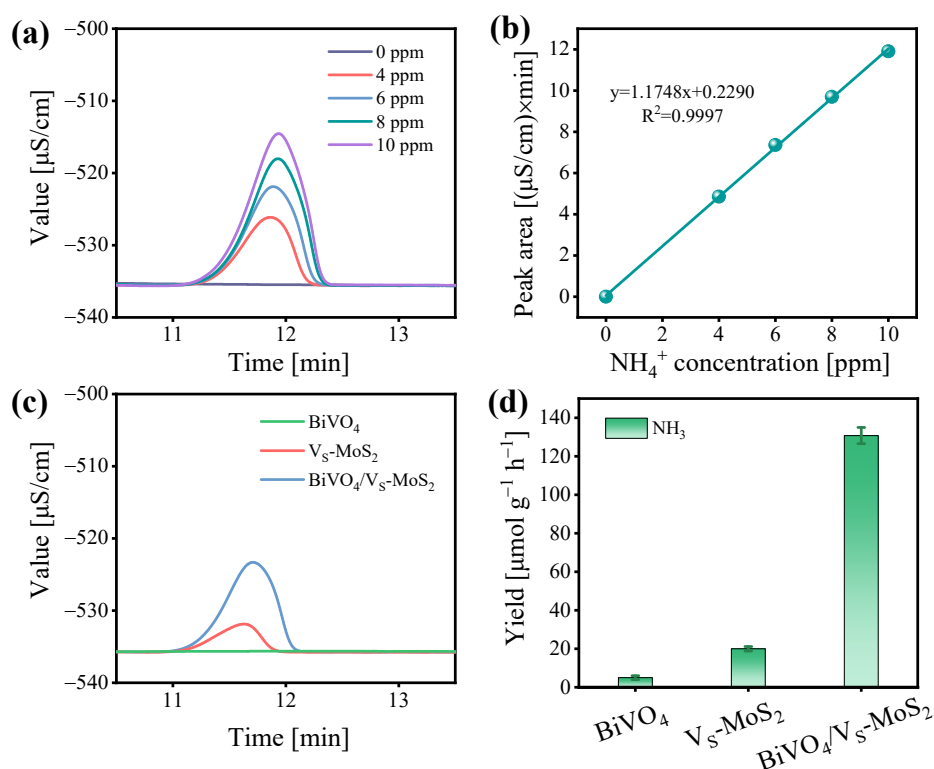

**Fig. S15.** (a) Ion chromatography of  $\text{NH}_4^+$  solution with different concentrations, and (b) the corresponding calibration curve used for calculating the concentration of  $\text{NH}_4^+$ . (c) Ion chromatography of product solution after photocatalytic  $\text{N}_2$  reduction with  $\text{BiVO}_4$ ,  $\text{V}_\text{S}\text{-MoS}_2$ , and  $\text{BiVO}_4/\text{V}_\text{S}\text{-MoS}_2$  as catalysts, respectively. (d) The yields of  $\text{NH}_3$  production for  $\text{BiVO}_4$ ,  $\text{V}_\text{S}\text{-MoS}_2$ , and  $\text{BiVO}_4/\text{V}_\text{S}\text{-MoS}_2$ .

As shown in Fig. S15c and 15d, pure  $\text{BiVO}_4$  has nearly no  $\text{NH}_3$  synthesis activity, and  $\text{V}_\text{S}\text{-MoS}_2$  has a weak  $\text{NH}_3$  activity ( $19.1 \pm 1.3 \mu\text{mol g}^{-1} \text{h}^{-1}$ ).  $\text{BiVO}_4/\text{V}_\text{S}\text{-MoS}_2$  shows a significantly improved photocatalytic  $\text{NH}_3$  synthesis performance of  $130.7 \pm 3.9 \mu\text{mol g}^{-1} \text{h}^{-1}$ , nearly 7 times that of pure  $\text{V}_\text{S}\text{-MoS}_2$ . These results are in agreement with those obtained by the indophenol blue method.

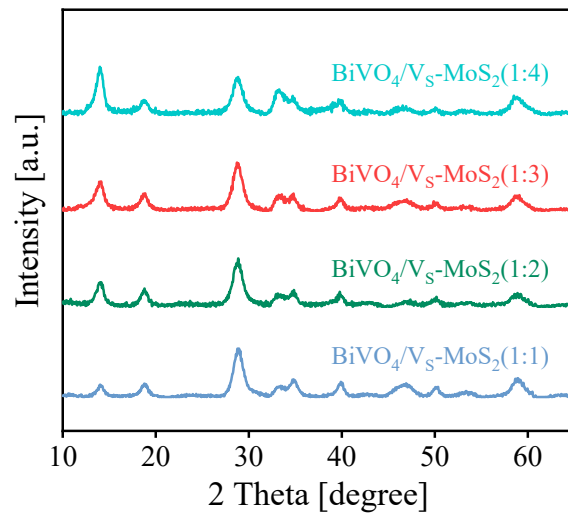

**Fig. S16.** The XRD patterns of BiVO<sub>4</sub>/V<sub>S</sub>-MoS<sub>2</sub> composites with different proportions.

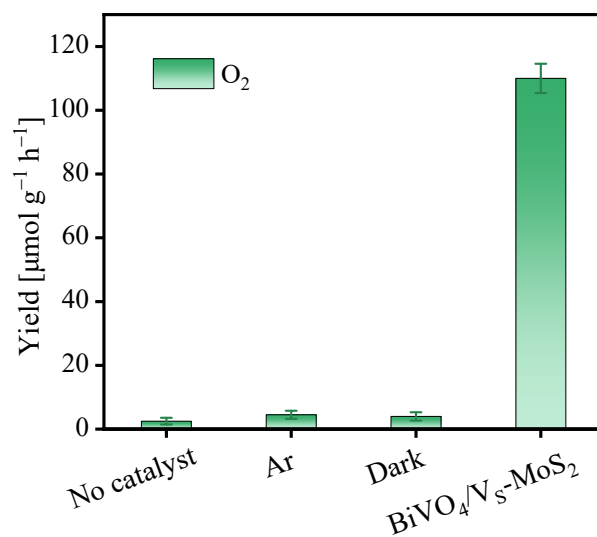

**Fig. S17.** The O<sub>2</sub> generation rates during photocatalytic reaction using BiVO<sub>4</sub>/V<sub>S</sub>-MoS<sub>2</sub> as photocatalyst under different conditions.

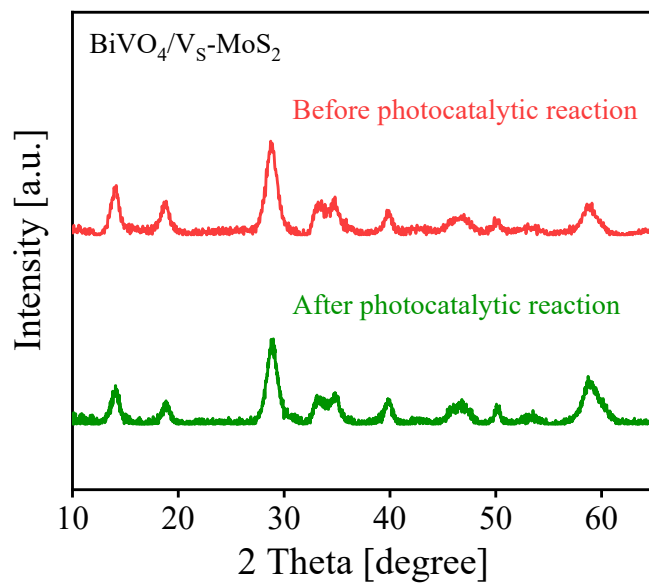

**Fig. S18.** The XRD patterns of  $\text{BiVO}_4/\text{V}_\text{S}\text{-MoS}_2$  before and after photocatalytic reaction.

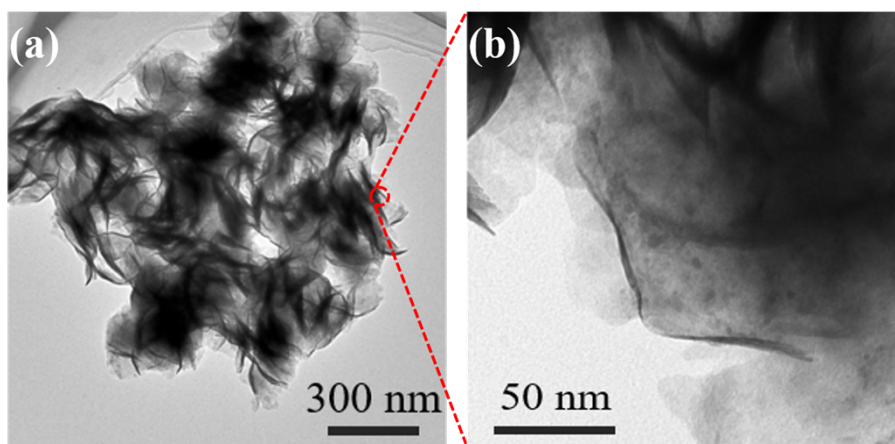

**Fig. S19.** The TEM images of  $\text{BiVO}_4/\text{V}_s\text{-MoS}_2$  after photocatalytic  $\text{N}_2$  fixation reaction.

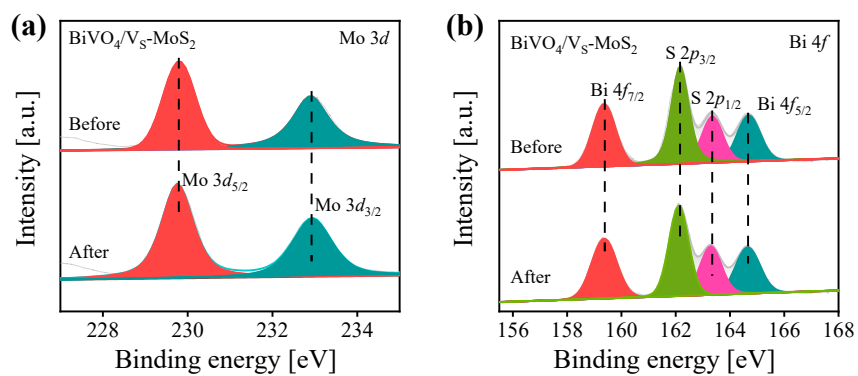

**Fig. S20.** High-resolution XPS spectra of  $\text{BiVO}_4/\text{V}_\text{s}\text{-MoS}_2$  before and after photocatalytic  $\text{N}_2$  fixation reaction. (a) Mo 3d and (b) Bi 4f.



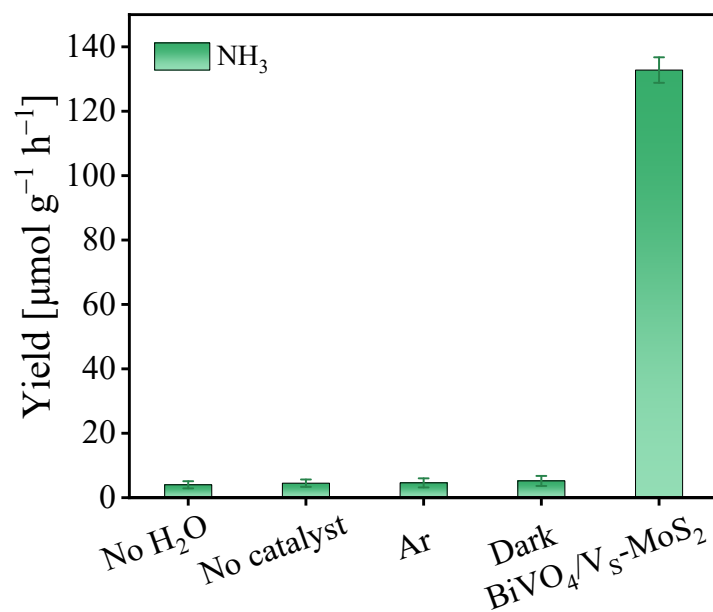

**Fig. S21.** Control experimental results under different conditions with BiVO<sub>4</sub>/V<sub>S</sub>-MoS<sub>2</sub> as photocatalytic catalyst.

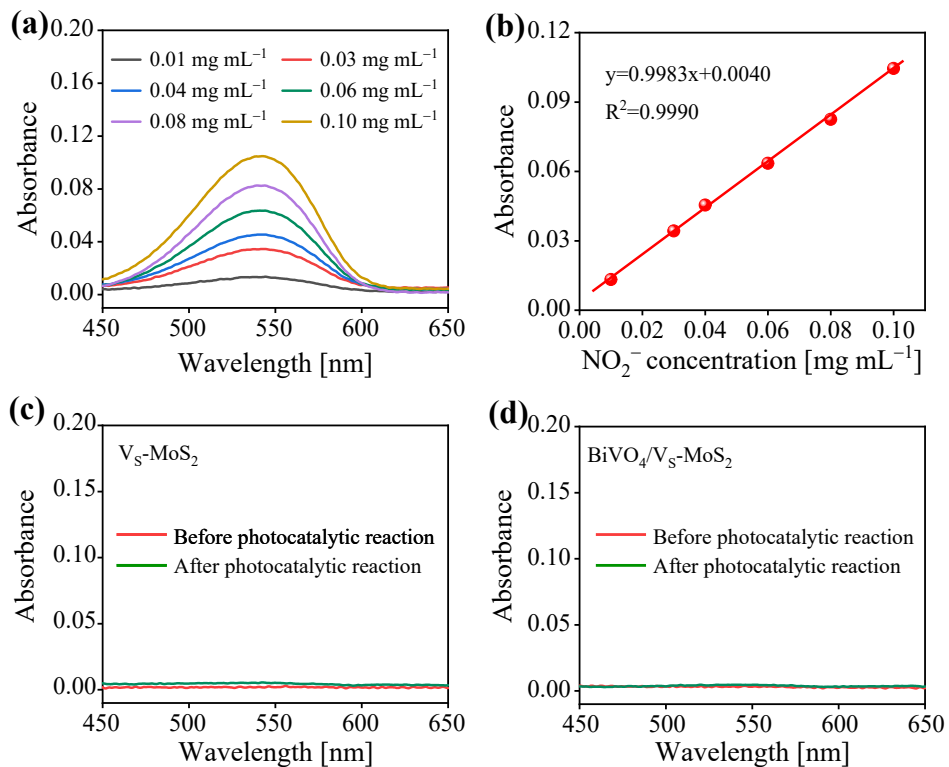

**Fig. S22.** (a) UV-Vis absorption spectra of  $\text{NO}_2^-$  solutions with different concentrations measured by colorimetric method, and (b) the corresponding calibration curve used for calculating the concentration of  $\text{NO}_2^-$ . (c, d) UV-Vis absorption spectra of product solutions measured by colorimetric method before and after photocatalytic  $\text{N}_2$  reduction with  $\text{V}_S\text{-MoS}_2$  and  $\text{BiVO}_4/\text{V}_S\text{-MoS}_2$  as catalysts, respectively.

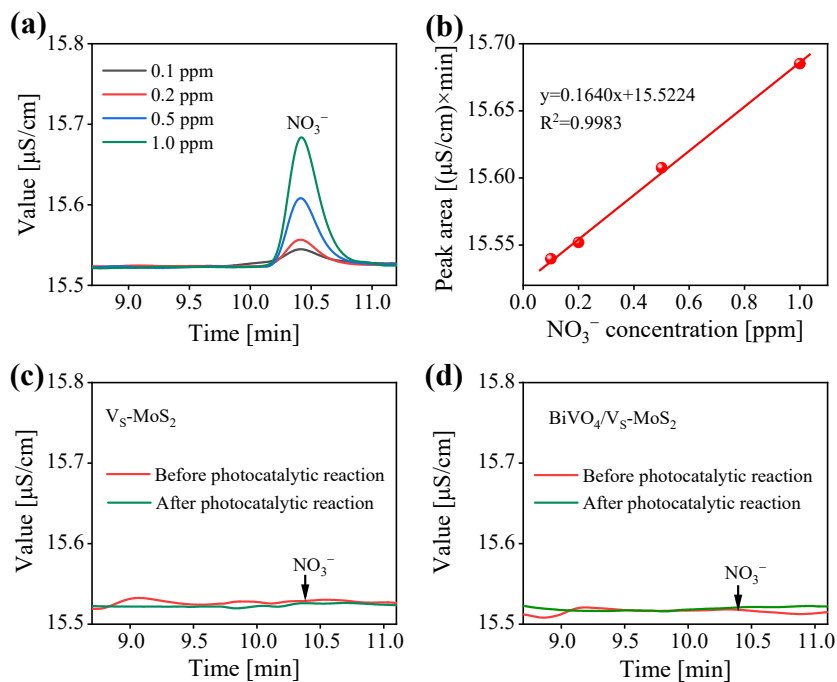

**Fig. S23.** (a) Ion chromatography of  $\text{NO}_3^-$  solution with different concentrations, and (b) the corresponding calibration curve used for calculating the concentration of  $\text{NO}_3^-$ . (c, d) Ion chromatography of product solution before and after photocatalytic  $\text{N}_2$  reduction with  $\text{V}_5\text{-MoS}_2$  and  $\text{BiVO}_4/\text{V}_5\text{-MoS}_2$  as catalysts, respectively.

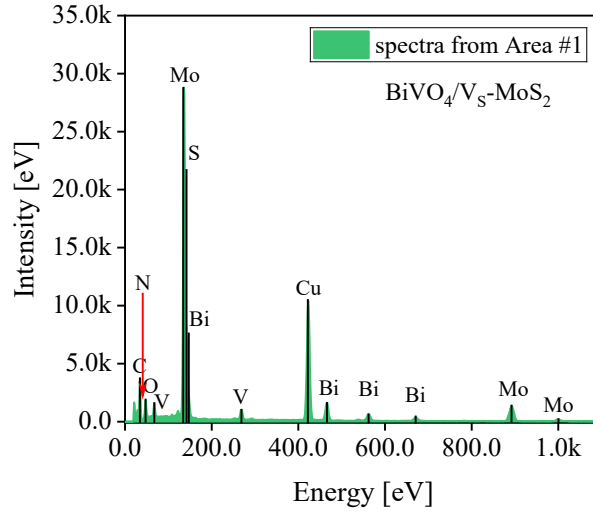

**Fig. S24.** EDS peaks of BiVO<sub>4</sub>/V<sub>S</sub>-MoS<sub>2</sub>.

**Table S2.** The atomic percentages of BiVO<sub>4</sub>/V<sub>S</sub>-MoS<sub>2</sub> obtained by analyzing EDS elemental mapping.

| Elements | Atomic Fraction (%) | Atomic Error (%) |
|----------|---------------------|------------------|
| N        | 0                   | NA               |
| O        | 3.4                 | 0.3              |
| S        | 36.6                | 2.3              |
| V        | 3.0                 | 0.2              |
| Mo       | 44.7                | 3.1              |
| Bi       | 12.3                | 0.5              |

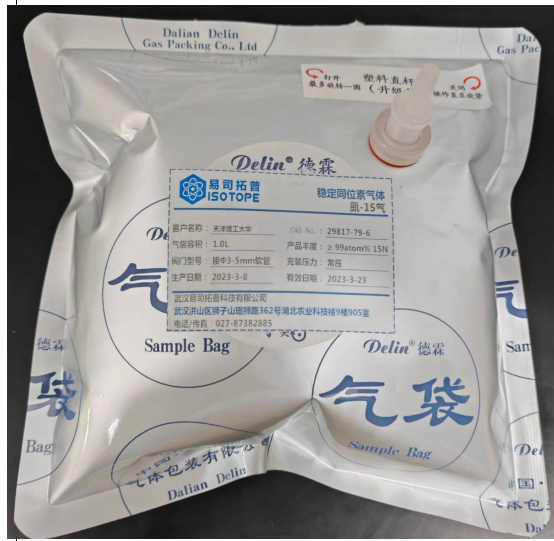

Fig. 25. The  $^{15}\text{N}_2$  bag for isotope labeling tests.

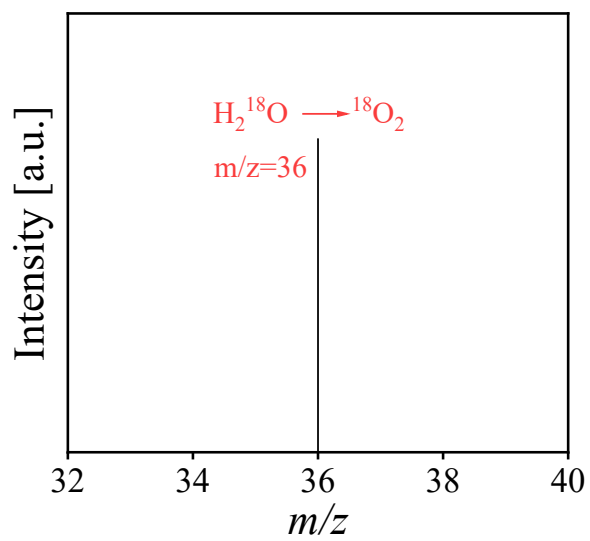

**Fig. S26.** MS analysis of photocatalytic H<sub>2</sub><sup>18</sup>O oxidation to <sup>18</sup>O<sub>2</sub> ( $m/z = 36$ ) using BiVO<sub>4</sub>/V<sub>S</sub>-MoS<sub>2</sub> as the photocatalyst.

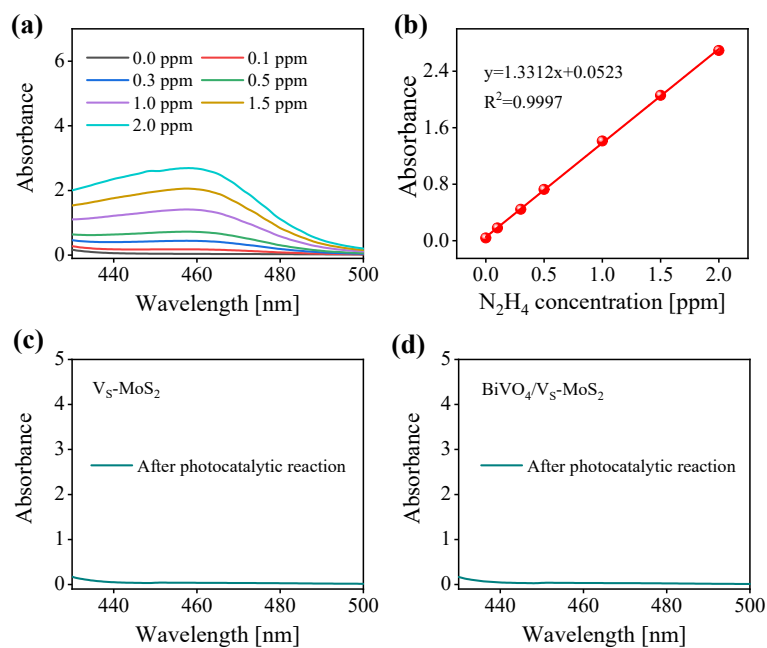

**Fig. S27.** (a) UV–Vis absorption spectra of  $\text{N}_2\text{H}_4$  solutions with different concentrations measured by the Watt–Chrisp method (the details were described in the Methods section), and (b) the corresponding calibration curve. UV–Vis absorption spectra of product solutions measured by the Watt–Chrisp method with (c)  $\text{V}_5\text{-MoS}_2$  and (d)  $\text{BiVO}_4/\text{V}_5\text{-MoS}_2$  as photocatalysts.
